# Supplementary material for: Tetramethylpyrazine-loaded electroconductive hydrogels promote tissue repair after spinal cord injury by protecting the blood–spinal cord barrier and neurons
Source: Royal Society of Chemistry journal article supplement (doi:10.1039/d3tb02160b), 2024-01-01
Supplement: d3tb02160b2.pdf [file d3tb02160b2.pdf]

**Table S1.** the thickness of the inflammatory layer for hydrogels implantation (n = 6,  $\bar{x} \pm s$ )

| Time | Control     | GM              | GMP             | GMPT            | P values |
|------|-------------|-----------------|-----------------|-----------------|----------|
| 7d   | 39.33±12.60 | 840.50±58.69*** | 842.00±63.76*** | 894.83±96.06*** | 0.003    |
| 28d  | 35.67±7.03  | 306.50±58.34*** | 308.67±31.18*** | 294.83±19.68*** | 0.004    |
| 56d  | 30.50±7.42  | 121.50±34.41*** | 125.33±26.01*** | 109.17±22.61*** | 0.003    |

Notes: Groups were analyzed with a one-way ANOVA and Bonferroni multiple comparison test (vs Control group, \*\*\* $P < 0.001$ ).

**Table S2.** BBB scores at various time points for the five groups (n = 6,  $\bar{x} \pm s$ )

| Time | Sham         | SCI           | TMP           | GMP                           | GMPT                                      | P values |
|------|--------------|---------------|---------------|-------------------------------|-------------------------------------------|----------|
| 0d   | 21.00 ± 0.00 | 21.00 ± 0.00  | 21.00 ± 0.00  | 21.00 ± 0.00                  | 21.00 ± 0.00                              | -        |
| 1d   | 21.00 ± 0.00 | 0.00 ± 0.00** | 0.00 ± 0.00** | 0.00 ± 0.00**                 | 0.00 ± 0.00**                             | 0.000    |
| 3d   | 21.00 ± 0.00 | 0.33 ± 0.52** | 0.50 ± 0.55*  | 0.50 ± 0.55*                  | 0.50 ± 0.55*                              | 0.003    |
| 7d   | 21.00 ± 0.00 | 0.83 ± 0.75** | 1.17 ± 0.75** | 3.00 ± 0.89*** $\Delta\Delta$ | 3.67 ± 1.03*** $\Delta\Delta$             | 0.000    |
| 14d  | 21.00 ± 0.00 | 2.00 ± 0.89** | 2.66 ± 0.82** | 3.67 ± 0.82*** $\Delta\Delta$ | 5.17 ± 0.75*** $\Delta\Delta\Delta\Delta$ | 0.000    |
| 28d  | 21.00 ± 0.00 | 2.50 ± 0.55** | 4.17 ± 0.98*  | 4.67 ± 0.82                   | 6.17 ± 0.75 $\Delta\Delta$                | 0.000    |

Notes: Groups were analyzed with a one-way ANOVA and Bonferroni multiple comparison test (GMPT vs Sham group, \* $P < 0.05$ , \*\* $P < 0.01$ ; vs SCI group,  $\Delta\Delta P < 0.01$ ; vs TMP group,  $\Delta\Delta P < 0.01$ ; vs GMP group,  $\Delta\Delta P < 0.01$ ).

**Table S3.** modified Rivlin-Tator Angleboard test at various time points for the five groups (n = 6,  $\bar{x} \pm s$ )

| Time | Sham         | SCI            | TMP            | GMP           | GMPT                  | P values |
|------|--------------|----------------|----------------|---------------|-----------------------|----------|
| 0d   | 52.50 ± 2.74 | 52.50 ± 2.74   | 52.50 ± 2.74   | 51.67 ± 2.58  | 53.33 ± 2.58          | 0.863    |
| 1d   | 50.83 ± 3.76 | 5.83 ± 2.04**  | 6.67 ± 2.58*   | 6.67 ± 2.58*  | 8.33 ± 4.08           | 0.002    |
| 3d   | 52.50 ± 2.74 | 7.50 ± 4.18**  | 12.50 ± 4.18*  | 14.17 ± 3.76  | 15.00 ± 4.47          | 0.001    |
| 7d   | 52.50 ± 2.74 | 12.50 ± 6.1**  | 15.00 ± 3.16** | 20.00 ± 4.47  | 23.33 ± 5.16          | 0.000    |
| 14d  | 51.67 ± 2.58 | 18.33 ± 6.06** | 20.83 ± 4.92** | 23.33 ± 2.58* | 28.33 ± 5.16          | 0.001    |
| 28d  | 52.50 ± 2.74 | 20.00 ± 4.47** | 25.00 ± 3.16** | 25.83 ± 2.04* | 32.50 ± 2.74 $\Delta$ | 0.000    |

Notes: Unit: Degrees (°). Groups were analyzed with a one-way ANOVA and Bonferroni multiple comparison test (GMPT vs Sham group, \* $P < 0.05$ , \*\* $P < 0.01$ ; vs SCI group, # $P < 0.05$ ).
